# Supplementary material for: Knocking out the Vitamin D Receptor Enhances Malignancy and Decreases Responsiveness to Vitamin D3 Hydroxyderivatives in Human Melanoma Cells
Source: MDPI journal article supplement (doi:10.3390/cancers13133111), 2021-06-22
Supplement: s1 [file s1]

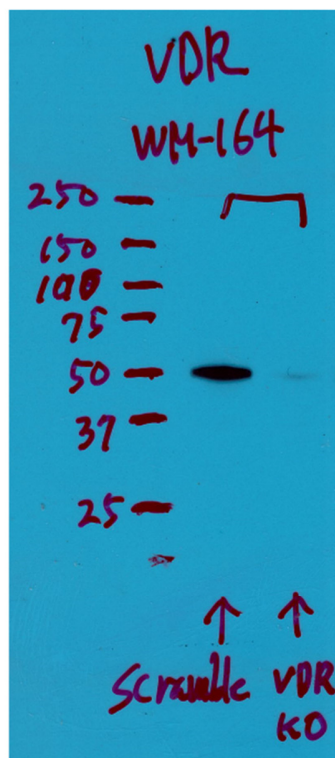

VDR

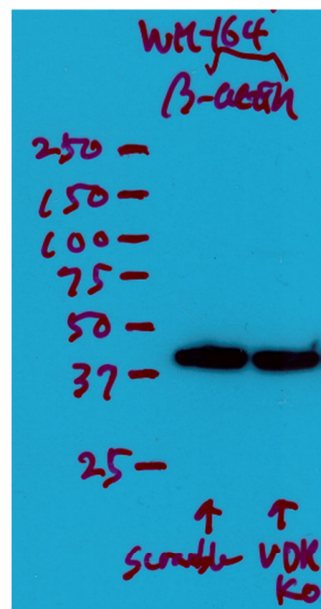

β-actin

Supplementary Figure 1. Western blot analysis for VDR and β-actin protein expressions in scrambled and VDR knockout WM-164 melanoma cells. For details see materials and methods
